# Supplementary material for: COVID-19 Intensive Care—Evaluation of Public Information Sources and Current Standards of Care in German Intensive Care Units: A Cross Sectional Online Survey on Intensive Care Staff in Germany
Source: MDPI journal article supplement (doi:10.3390/healthcare10071315), 2022-07-15
Supplement: s1 [file s1]

Table S1 CHERRIES

| Item category                                                                        | Checklist Item                                                                                            | Reported |
|--------------------------------------------------------------------------------------|-----------------------------------------------------------------------------------------------------------|----------|
| Design                                                                               | Describe survey design                                                                                    | ✓        |
| IRB (Institutional Review Board) approval and informed consent process               | IRB approval                                                                                              | ✓        |
|                                                                                      | Informed consent                                                                                          | ✓        |
| Development and pre-testing                                                          | Development and testing                                                                                   | ✓        |
| Recruitment process and description of the sample having access to the questionnaire | Open survey vs closed survey                                                                              | ✓        |
|                                                                                      | Contact mode                                                                                              | ✓        |
|                                                                                      | Advertising the survey                                                                                    | ✓        |
|                                                                                      | Web/E-mail                                                                                                | ✓        |
| Survey administration                                                                | Context                                                                                                   | ✓        |
|                                                                                      | Mandatory/voluntary                                                                                       | ✓        |
|                                                                                      | Incentives                                                                                                | ✓        |
|                                                                                      | Time/Date                                                                                                 | ✓        |
|                                                                                      | Randomization of items or questionnaires                                                                  | ✓        |
|                                                                                      | Adaptive questioning                                                                                      | ✓        |
|                                                                                      | Number of Items                                                                                           | ✓        |
|                                                                                      | Number of screens (pages)                                                                                 | ✓        |
|                                                                                      | Unique site visitor                                                                                       | n/a      |
|                                                                                      | View rate (Ratio of unique survey visitors/unique site visitors)                                          | n/a      |
| Response rates                                                                       | Participation rate (Ratio of unique visitors who agreed to participate/unique first survey page visitors) | n/a      |
|                                                                                      | Completion rate (Ratio of users who finished the survey/users who agreed to participate)                  | ✓        |
| Preventing multiple entries from the same individual                                 | Cookies used                                                                                              | ✓        |
|                                                                                      | IP Check                                                                                                  | ✓        |
|                                                                                      | Log file analysis                                                                                         | ✓        |
|                                                                                      | Registration                                                                                              | ✓        |
| Analysis                                                                             | Handling of incomplete questionnaires                                                                     | ✓        |
|                                                                                      | Questionnaires submitted with an atypical timestamp                                                       | n/a      |
|                                                                                      | Statistical correction                                                                                    | ✓        |
