# Supplementary material for: COVID-19 Intensive Care—Evaluation of Public Information Sources and Current Standards of Care in German Intensive Care Units: A Cross Sectional Online Survey on Intensive Care Staff in Germany
Source: MDPI journal article supplement (doi:10.3390/healthcare10071315), 2022-07-15
Supplement: s1 [file s1]

Table S3

## Age characteristics for participants

| age group | medical residents |      |                    |      | intensive care nurses |      |        |      | total (n=127) |      |
|-----------|-------------------|------|--------------------|------|-----------------------|------|--------|------|---------------|------|
|           | (n=26)            |      | specialists (n=50) |      | nurses (n=20)         |      | (n=31) |      |               |      |
|           | n                 | %    | n                  | %    | n                     | %    | n      | %    | n             | %    |
| <20 - 30  | 12                | 46.2 | -                  | -    | 10                    | 50.0 | 2      | 6.5  | 24            | 19.9 |
| 31 - 40   | 14                | 53.8 | 17                 | 34.0 | 5                     | 25.0 | 6      | 19.4 | 42            | 33.1 |
| 41 - 50   | -                 | -    | 19                 | 38.0 | 3                     | 15.0 | 14     | 45.2 | 36            | 28.3 |
| >50       | -                 | -    | 14                 | 28.0 | 2                     | 10.0 | 9      | 29.0 | 25            | 19.7 |

## Group differences in quality assessment between users and non-users (Mann-Whitney-U-Test)

|                                                      | <i>U</i> | <i>Z</i> | <i>p</i> | <i>r</i> |
|------------------------------------------------------|----------|----------|----------|----------|
| social media (n=98)                                  | 147.00   | -4.81    | <.001*   | -0.49    |
| everyday-media (e.g. Radio, TV) (n=116)              | 811.000  | -4.60    | <.001*   | -0.43    |
| newsletter/ email (n=94)                             | 470.000  | -3.66    | <.001*   | -0.38    |
| FOAM (n=56)                                          | 166.500  | -3.366   | <.001*   | -0.45    |
| medical information portals (n=87)                   | 731.000  | -1.78    | .075     | -0.19    |
| websites of the scientific medical societies (n=100) | 830.500  | -2.51    | .012     | -0.25    |
| medical journals (n=106)                             | 812.000  | -2.76    | .006*    | -0.27    |
| inhouse SOP's/procedural instructions (n=119)        | 886.000  | -1.27    | .206     | -0.12    |

\* significant  $p < .05$ 

## Percentage of coagulation dosing according to professions

| coagulation            | physicians (n=64) |      | nursing staff (n=38) |      | total (n=102) |      |
|------------------------|-------------------|------|----------------------|------|---------------|------|
|                        | n                 | %    | n                    | %    | n             | %    |
| prophylactic dosing    | 36                | 56.2 | 16                   | 42.1 | 52            | 51.0 |
| semitherapeutic dosing | 16                | 25.0 | 8                    | 21.1 | 24            | 23.5 |
| therapeutic dosing     | 12                | 18.8 | 14                   | 36.8 | 26            | 25.5 |
