# Supplementary material for: COVID-19 Intensive Care—Evaluation of Public Information Sources and Current Standards of Care in German Intensive Care Units: A Cross Sectional Online Survey on Intensive Care Staff in Germany
Source: MDPI journal article supplement (doi:10.3390/healthcare10071315), 2022-07-15
Supplement: s1 [file s1]

## Table S2 questionnaire

Questionnaire, notes for reply are highlighted in italics,

\* for questions with multiple answers possible,

(<sup>a</sup>) question identical to 2020 survey

|                                                                                                                                                     |                                                               |                                    |
|-----------------------------------------------------------------------------------------------------------------------------------------------------|---------------------------------------------------------------|------------------------------------|
| What type of facility do you work in?                                                                                                               |                                                               |                                    |
| <input type="radio"/> Primary care/standard care hospital (service Level 1)                                                                         | <input type="radio"/> specialist clinic                       |                                    |
| <input type="radio"/> Hospital with special care (service level 2)                                                                                  | <input type="radio"/> maximum care hospital (service level 3) |                                    |
|                                                                                                                                                     | <input type="radio"/> other (free text)                       |                                    |
| Have you ever treated COVID Patients in the ICU?                                                                                                    |                                                               |                                    |
| <input type="radio"/> yes                                                                                                                           | <input type="radio"/> no                                      |                                    |
| To which professional group do you belong?                                                                                                          |                                                               |                                    |
| <input type="radio"/> medical resident                                                                                                              | <input type="radio"/> intensive care nurse                    |                                    |
| <input type="radio"/> specialist                                                                                                                    | <input type="radio"/> nurse                                   |                                    |
|                                                                                                                                                     | <input type="radio"/> other health professionals              |                                    |
| Do you perform a ward management function with setting of treatment/care plan?                                                                      |                                                               |                                    |
| <input type="radio"/> yes                                                                                                                           | <input type="radio"/> no                                      |                                    |
| Do you currently have an established standard of care for patients with COVID-19 pneumonia?                                                         |                                                               |                                    |
| <input type="radio"/> yes                                                                                                                           | <input type="radio"/> no                                      | <input type="radio"/> I don't know |
| Were you a collaborator in the CEOsys project?                                                                                                      |                                                               |                                    |
| <input type="radio"/> yes                                                                                                                           | <input type="radio"/> no                                      |                                    |
| To which of the following age categories do you belong?                                                                                             |                                                               |                                    |
| <input type="radio"/> <20                                                                                                                           | <input type="radio"/> 36-40                                   |                                    |
| <input type="radio"/> 21-25                                                                                                                         | <input type="radio"/> 41-45                                   |                                    |
| <input type="radio"/> 26-30                                                                                                                         | <input type="radio"/> 46-50                                   |                                    |
| <input type="radio"/> 31-35                                                                                                                         | <input type="radio"/> >50                                     |                                    |
| Which of the following sources of information about Covid-19 therapy do you use?*                                                                   |                                                               |                                    |
| <input type="radio"/> Everyday-media (e.g. radio, television) → please name which specific sources you use                                          |                                                               |                                    |
| <input type="radio"/> Social Media → please name which specific sources you use                                                                     |                                                               |                                    |
| <input type="radio"/> Medical journals → please name which specific sources you use                                                                 |                                                               |                                    |
| <input type="radio"/> Websites of professional societies → please name which specific sources you use                                               |                                                               |                                    |
| <input type="radio"/> Newsletter/Emails → please name which specific sources you use                                                                |                                                               |                                    |
| <input type="radio"/> Medical information portals → please name which specific sources you use                                                      |                                                               |                                    |
| <input type="radio"/> Free Open Access medial Education – FOAM (z.B. emcrit.org, nerd4allmedizin.blog) → please name which specific sources you use |                                                               |                                    |
| <input type="radio"/> In-house Standard Operation Procedures or procedural instructions                                                             |                                                               |                                    |

Please rate the quality of the following sources of information on COVID-19 therapy?\*

0=lowest quality to 10=very high quality, please also indicate if you do not using the rated option  
NRS from 0 to 10 plus "I do not know or do not know enough to evaluate the quality."

|                                                                                                        |                        | I don't know or not good enough to evaluate the quality. |
|--------------------------------------------------------------------------------------------------------|------------------------|----------------------------------------------------------|
| <input type="radio"/> Everyday-media (e.g. radio, TV)                                                  | 0 1 2 3 4 5 6 7 8 9 10 | <input type="radio"/>                                    |
| <input type="radio"/> Social Media                                                                     | 0 1 2 3 4 5 6 7 8 9 10 | <input type="radio"/>                                    |
| <input type="radio"/> Medical journals                                                                 | 0 1 2 3 4 5 6 7 8 9 10 | <input type="radio"/>                                    |
| <input type="radio"/> Websites of professional societies                                               | 0 1 2 3 4 5 6 7 8 9 10 | <input type="radio"/>                                    |
| <input type="radio"/> Newsletter/Emails                                                                |                        | <input type="radio"/>                                    |
| <input type="radio"/> Medical information portals                                                      | 0 1 2 3 4 5 6 7 8 9 10 | <input type="radio"/>                                    |
| <input type="radio"/> Free Open Access medial Education – FOAM (z.B. emcrit.org, nerdfallmedizin.blog) | 0 1 2 3 4 5 6 7 8 9 10 | <input type="radio"/>                                    |
| <input type="radio"/> In-house Standard Operation Procedures or procedural instructions                | 0 1 2 3 4 5 6 7 8 9 10 | <input type="radio"/>                                    |

Which organizations (source of information) do you consider as most trustworthy for information regarding medical therapy for COVID-19? <sup>(a)</sup>\*max.3

- ☐ Cochrane Collaboration
- ☐ German network evidence-based medicine (EbM-Netzwerk)
- ☐ Professional societies (z.B. DIVI, DGAI, DGIIN)
- ☐ National Health Care Guidelines Programme (Cooperation of Bundesärztekammer, KBV, AWMF)
- ☐ World Health Organisation (WHO)
- ☐ Robert-Koch-Institut (RKI)
- ☐ Federal Center for Health Education (Bundeszentrale für gesundheitliche Aufklärung - BZgA)
- ☐ others → free text

Do you use the S3- Guideline - Recommendations for inpatient therapy of patients with COVID-19?  
(filter question)

- ☐ yes ☐ no

If yes: How do you assess the applicability of the guideline?

- ☐ very bad (explanatory note) ☐ rather bad (explanatory note) ☐ undecided ☐ rather good ☐ very good

If no: What barriers make it difficult for you to use the guideline? *\*max.3*

- ☐ I don't have enough time to deal with the guidelines in my daily work.
- ☐ the use is not encouraged by my superiors.
- ☐ I have no experience in working with guidelines.
- ☐ access to the guidelines is too complicated.
- ☐ the contents of the guidelines are in my opinion not practicable in everyday life (e.g. too undifferentiated, not applicable to the individual).
- ☐ the contents of the guidelines are not well adapted to my target group (e.g. with regard to prior knowledge, relevance).
- ☐ Guidelines are too long.
- ☐ I don't know where or how to access current guidelines.
- ☐ others -> free text

Do you use the CEOsys website [www.covid-evidenz.de](http://www.covid-evidenz.de) ? (filter question)

- ☐ yes
- ☐ no

If yes: Would you recommend the website [www.covid-evidenz.de](http://www.covid-evidenz.de)?

- ☐ Yes (free text: reasons)
- ☐ no (free text: reasons)
- ☐ I don't know

If no: What barriers make it difficult for you to use the [www.covid-evidenz.de](http://www.covid-evidenz.de) website? *\*max.3*

- ☐ I don't have enough time to deal with the website in my daily work.
- ☐ the use is not encouraged by my superiors.
- ☐ i have no experience in using the website.
- ☐ access to the website is too complicated
- ☐ the contents of the website are, in my opinion, not practicable in everyday life (e.g. too undifferentiated, not applicable to the individual).
- ☐ the contents of the guideline are not well adapted to my target group (e.g. with regard to prior knowledge, relevance).
- ☐ the website isn't user-friendly
- ☐ i don't know the website
- ☐ other (free text)

Do you use the MagicApp? (A digital platform for creating and publishing evidence ecosystems from the Magic Evidence Foundation). (filter question)

- ☐ yes
- ☐ no

If yes: Would you recommend the use of the MagicApp?

- ☐ Yes
- ☐ no (free text: reasons)
- ☐ I don't know

If yes: How do you assess the applicability of the information provided there?

- ☐ very bad (free text: reasons)
- ☐ rather bad (free text: reasons)
- ☐ undecided
- ☐ rather good
- ☐ very good

If no: What barriers make it difficult for you to use the MagicApp? *\*max.3*

- ☐ I don't have enough time to deal with the website in my daily work.
- ☐ the use is not encouraged by my superiors.
- ☐ i have no experience in using the app.
- ☐ access is too complicated (technical requirements).
- ☐ the contents are in my opinion not practicable in everyday life (e.g. too undifferentiated, not applicable to the individual).
- ☐ the contents of the guidelines are not well adapted to my target group (e.g. with regard to prior knowledge, relevance).
- ☐ MagicApp isn't user-friendly
- ☐ I don't know where or how to access the app.
- ☐ other (free text)

Would you need to make a decision on how to proceed? What criteria would you use for discontinuing NIV ventilation in COVID-19 patients? <sup>(a)</sup> \*

- ☐ Consciousness disorder
- ☐ Respiratory rate
- ☐ Clinical assessment of the respiratory work
- ☐ Rapid-shallow-breathing-Index
- ☐ CO2 elimination disorder
- ☐ Horovitz/oxygenation index
- ☐ Work-of-breathing
- ☐ I don't know

What is the standard dosage of thromboembolism prophylaxis medication for patients you have to treat in the ICU for COVID-19 pneumonia?

- ☐ prophylactic
- ☐ semi-therapeutic (filter question)
- ☐ therapeutic (filter question)

If Semi-therapeutic/ Therapeutic anticoagulation: Do you control this dosage based on laboratory coagulation controls?

- ☐ Yes
- ☐ no
- ☐ I don't know

What COVID-19 specific medications are you currently using for therapy? \*

- ☐ Corticosteroid (e.g. Dexamethason)
- ☐ Remdesivir
- ☐ JAK Inhibitors (e.g. Baricitinib)
- ☐ Specific antibodies
- ☐ Reconvalescent plasma
- ☐ Ivermectin
- ☐ Vitamin D
- ☐ Hydroxychloroquin
- ☐ IL-6 receptor blockers (e.g. Tocilizumab, Sarilumab)
- ☐ Lopinavir/Ritonavir
- ☐ other (free text)

Follow-up for selected medications: What is the rationale for the decision to use this therapy?

- ☐ S3-guidelines inpatient treatment COVID-19
- ☐ own literature research
- ☐ determined by superiors
- ☐ good experience with this medication
- ☐ I don't know

Item from 2020 Survey

Severely ill COVID-19 patients should be treated with therapeutic anticoagulation/blood dilution.

- ☐ I do not agree at all
- ☐ I rather disagree
- ☐ I rather agree
- ☐ I fully agree
- ☐ I don't know
